# Supplementary material
Source: PubMed Central journal article supplement (PMC7852516)
Supplement: 41396_2020_775_MOESM8_ESM.pdf [file 41396_2020_775_MOESM8_ESM.pdf]

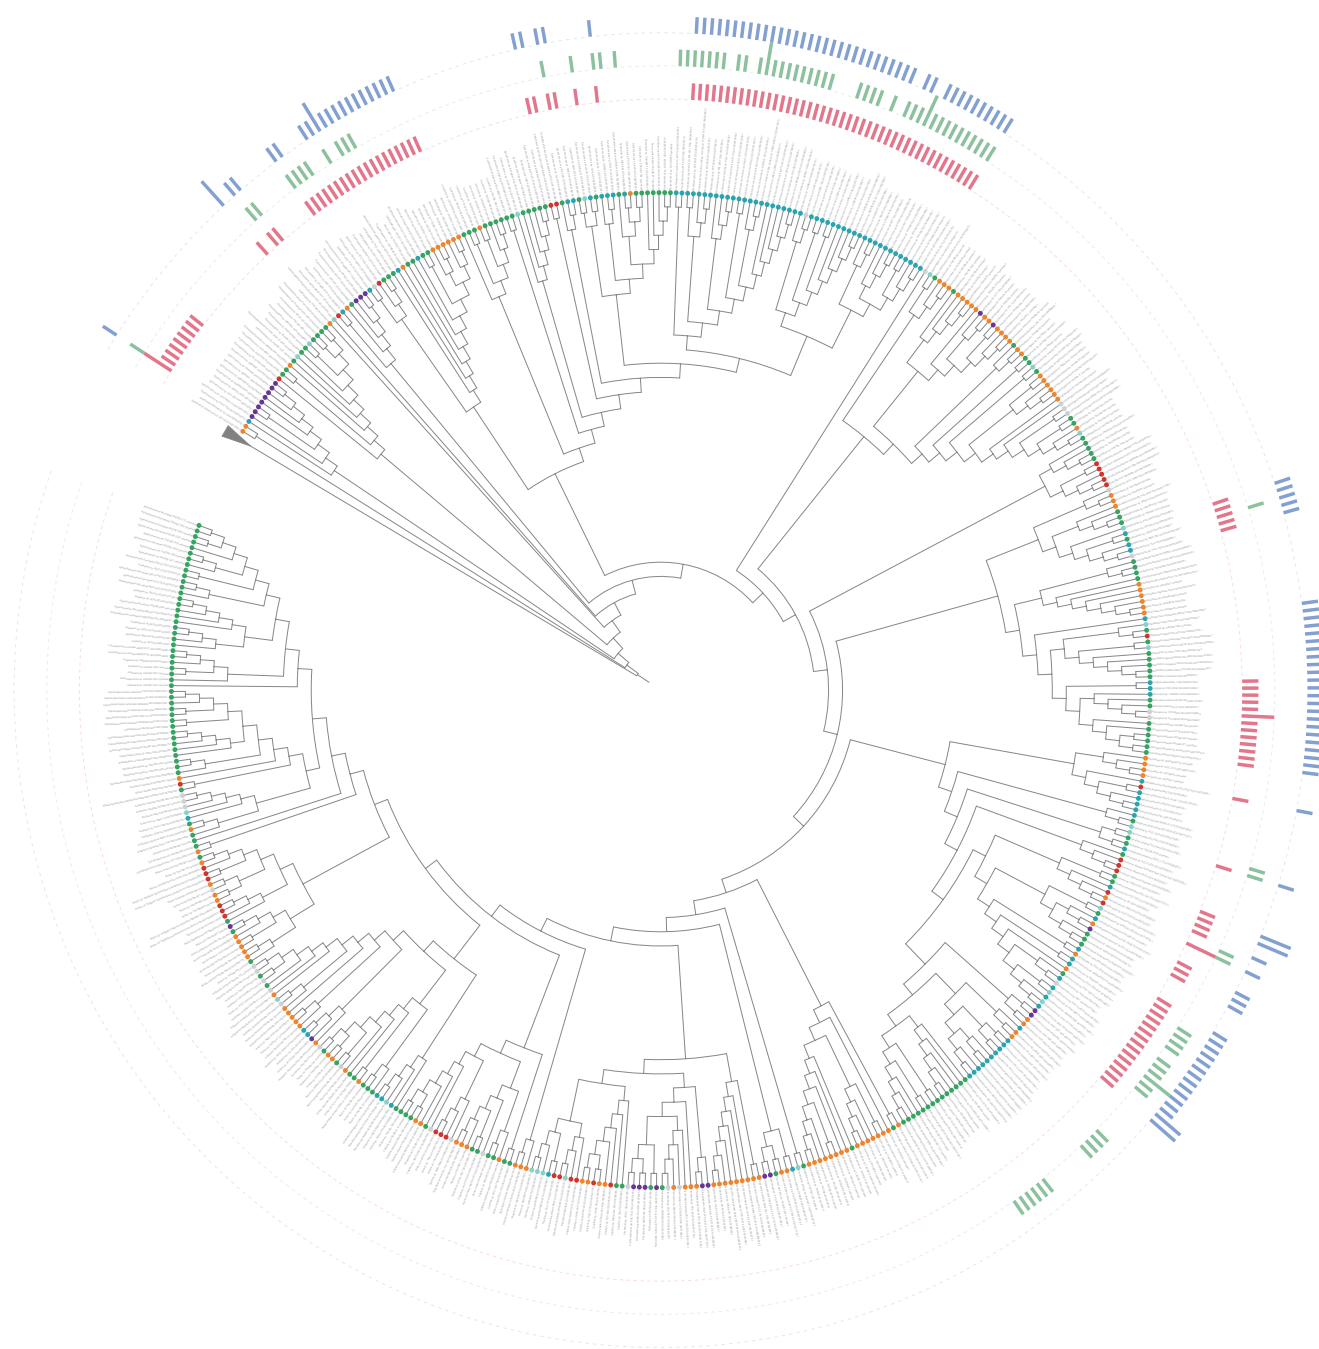

**Habitat classification**

- Marine (n = 99)
- Freshwater (n = 184)
- Terrestrial (n = 125)
- Thermal springs (n = 26)
- Host-associated (n = 33)
- Others (n = 24)
- Unknown (n = 28)

**Enriched genes/domains**

- mannosyl-3-phosphoglycerate phosphatase
- glucosylglycerol 3-phosphatase
- glucosyl-3-phosphoglycerate synthase

Fig S8. Phylogenetic distribution of marine-enriched gene/domains. The phylogenetic tree is a subtree of genomic tree in Fig.1 that low-quality genomes were pruned. Grey triangle on the tree denotes outgroups. Colored circles represent ecosystems where strains derived from. Colored bars denote copy numbers of enriched genes or domains.

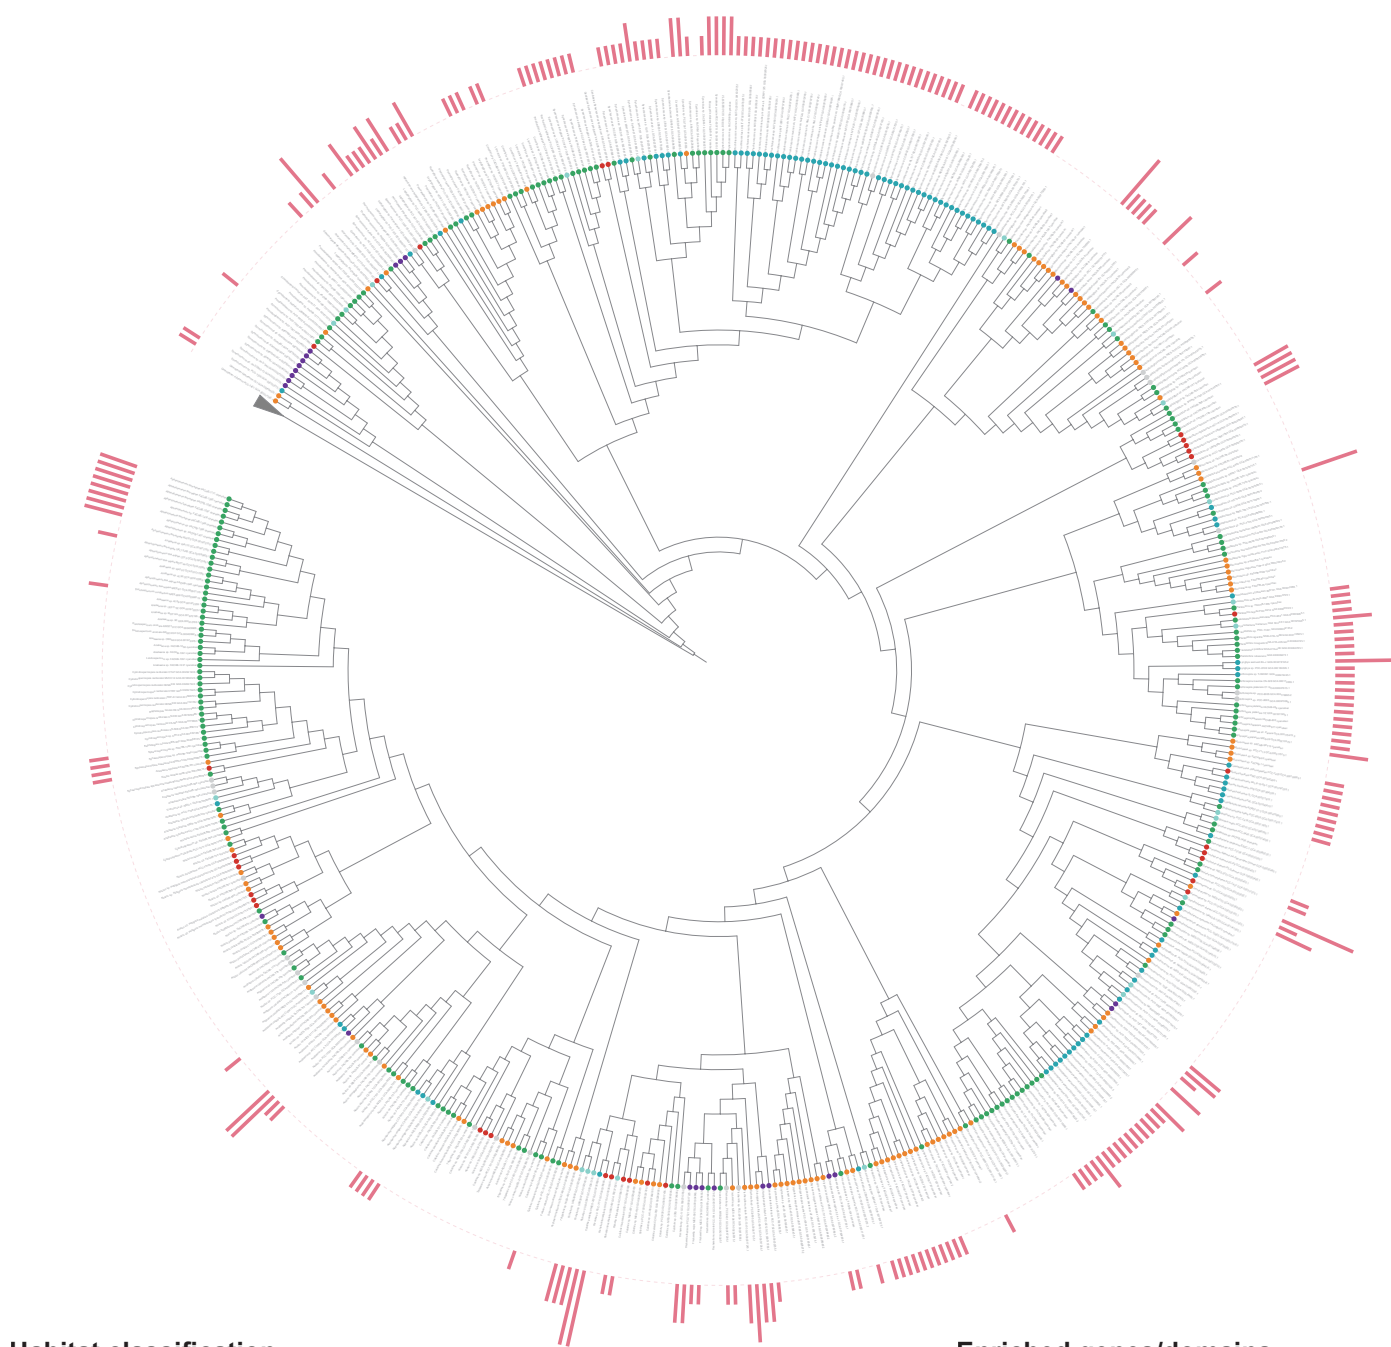

**Habitat classification**

- Marine (n = 99)
- Freshwater (n = 184)
- Terrestrial (n = 125)
- Thermal springs (n = 26)
- Host-associated (n = 33)
- Others (n = 24)
- Unknown (n = 28)

**Enriched genes/domains**

| *yrbG*

Fig S8. (Continued). Phylogenetic distribution of marine-enriched gene/domains. The phylogenetic tree is a subtree of genomic tree in Fig.1 that low-quality genomes were pruned. Grey triangle on the tree denotes outgroups. Colored circles represent ecosystems where strains derived from. Colored bars denote copy numbers of enriched genes or domains.

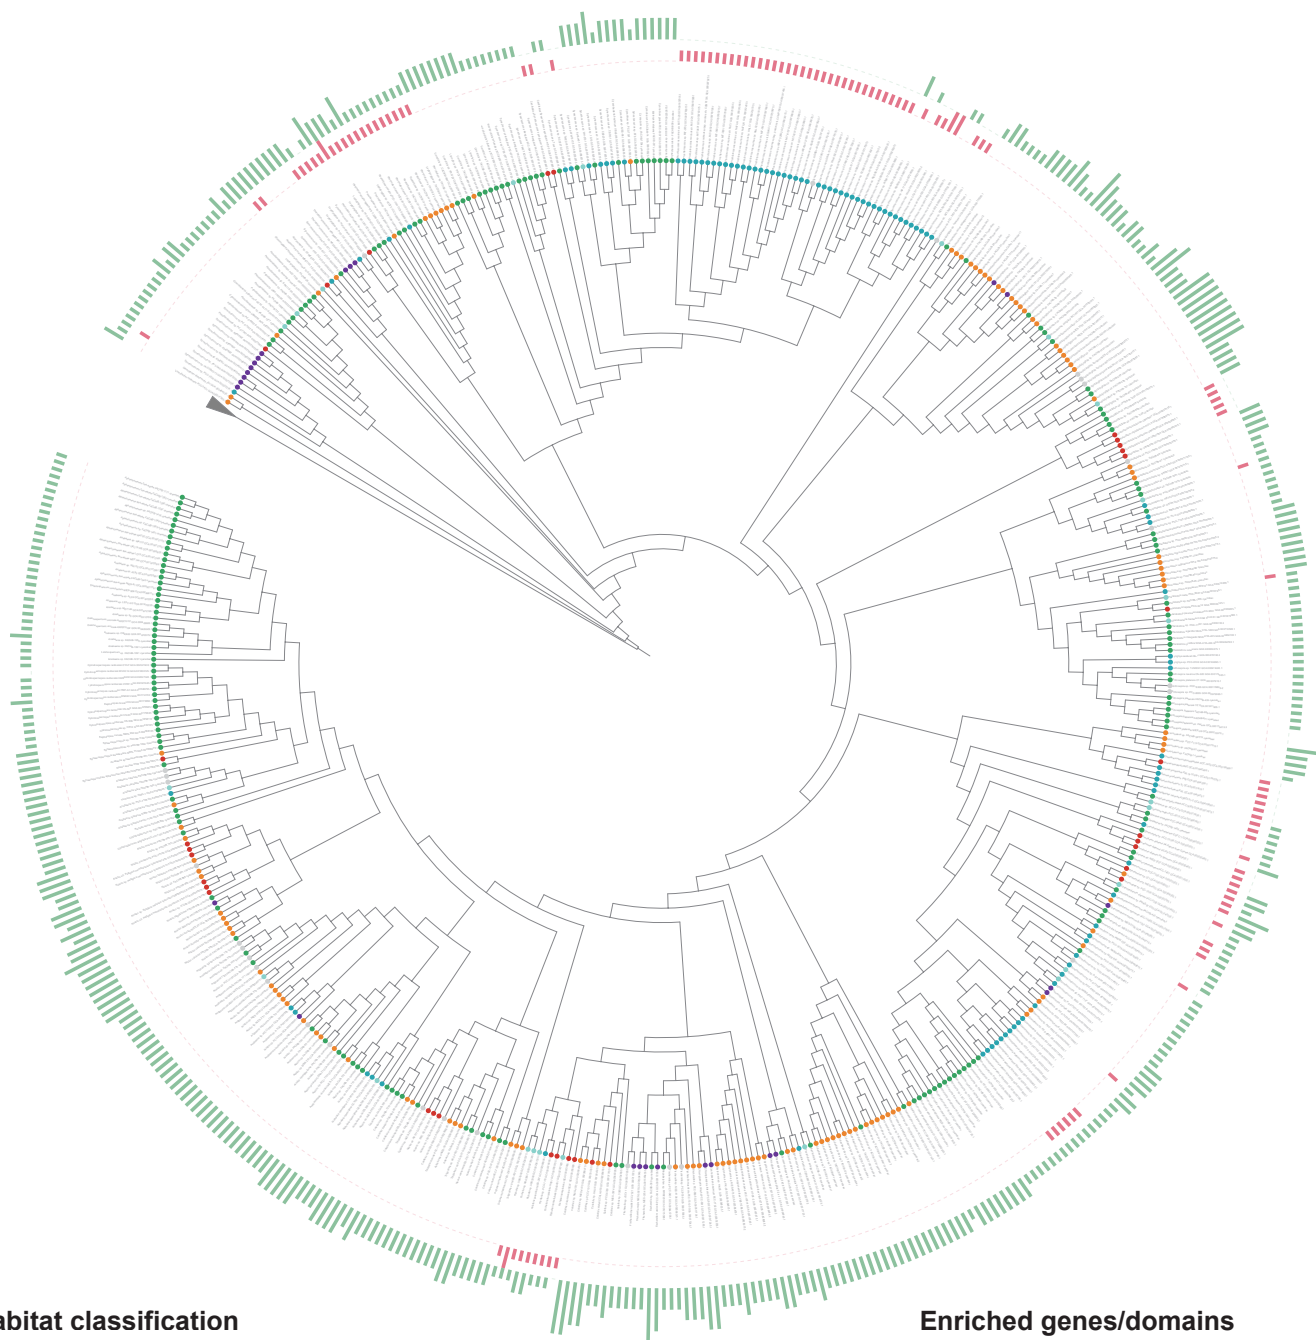

Fig S8. (Continued). Phylogenetic distribution of marine-enriched gene/domains. The phylogenetic tree is a subtree of genomic tree in Fig.1 that low-quality genomes were pruned. Grey triangle on the tree denotes outgroups. Colored circles represent ecosystems where strains derived from. Colored bars denote copy numbers of enriched genes or domains.

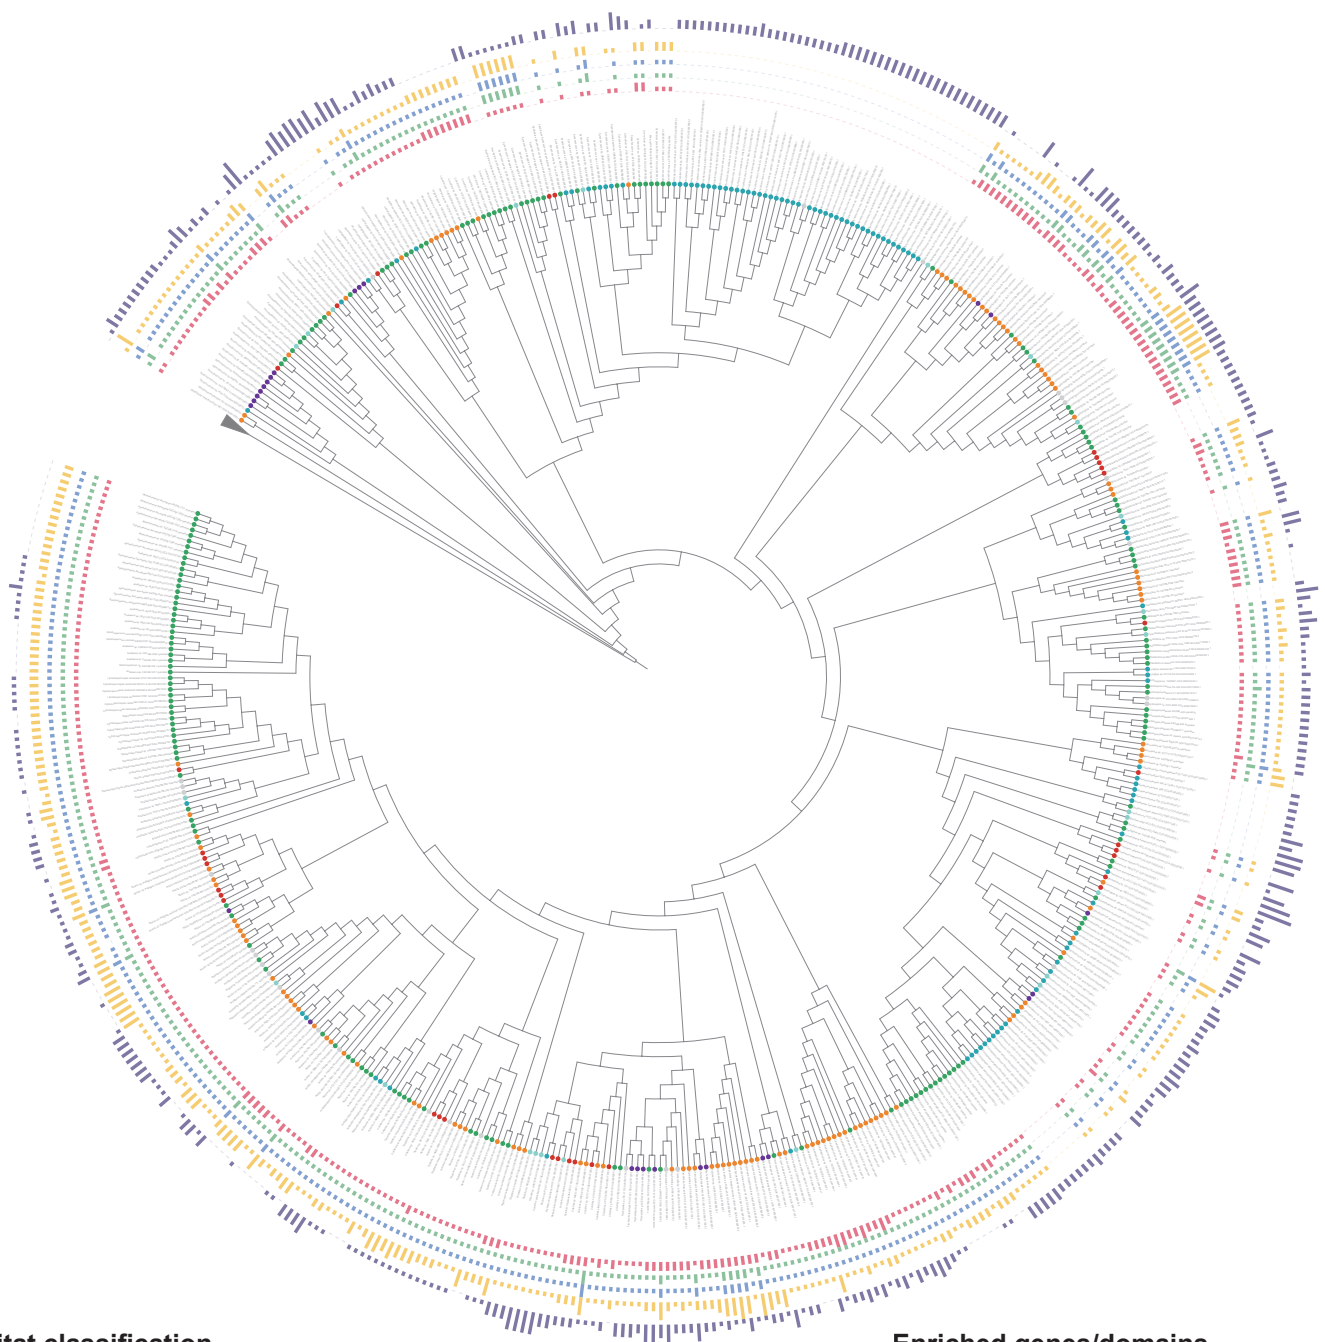

**Habitat classification**

- Marine (n = 99)
- Freshwater (n = 184)
- Terrestrial (n = 125)
- Thermal springs (n = 26)
- Host-associated (n = 33)
- Others (n = 24)
- Unknown (n = 28)

**Enriched genes/domains**

- | *cysA*
- | *cysU*
- | *cysW*
- | *cysP*
- | *sulP*

Fig S8. (Continued). Phylogenetic distribution of marine-enriched gene/domains. The phylogenetic tree is a subtree of genomic tree in Fig.1 that low-quality genomes were pruned. Grey triangle on the tree denotes outgroups. Colored circles represent ecosystems where strains derived from. Colored bars denote copy numbers of enriched genes or domains.

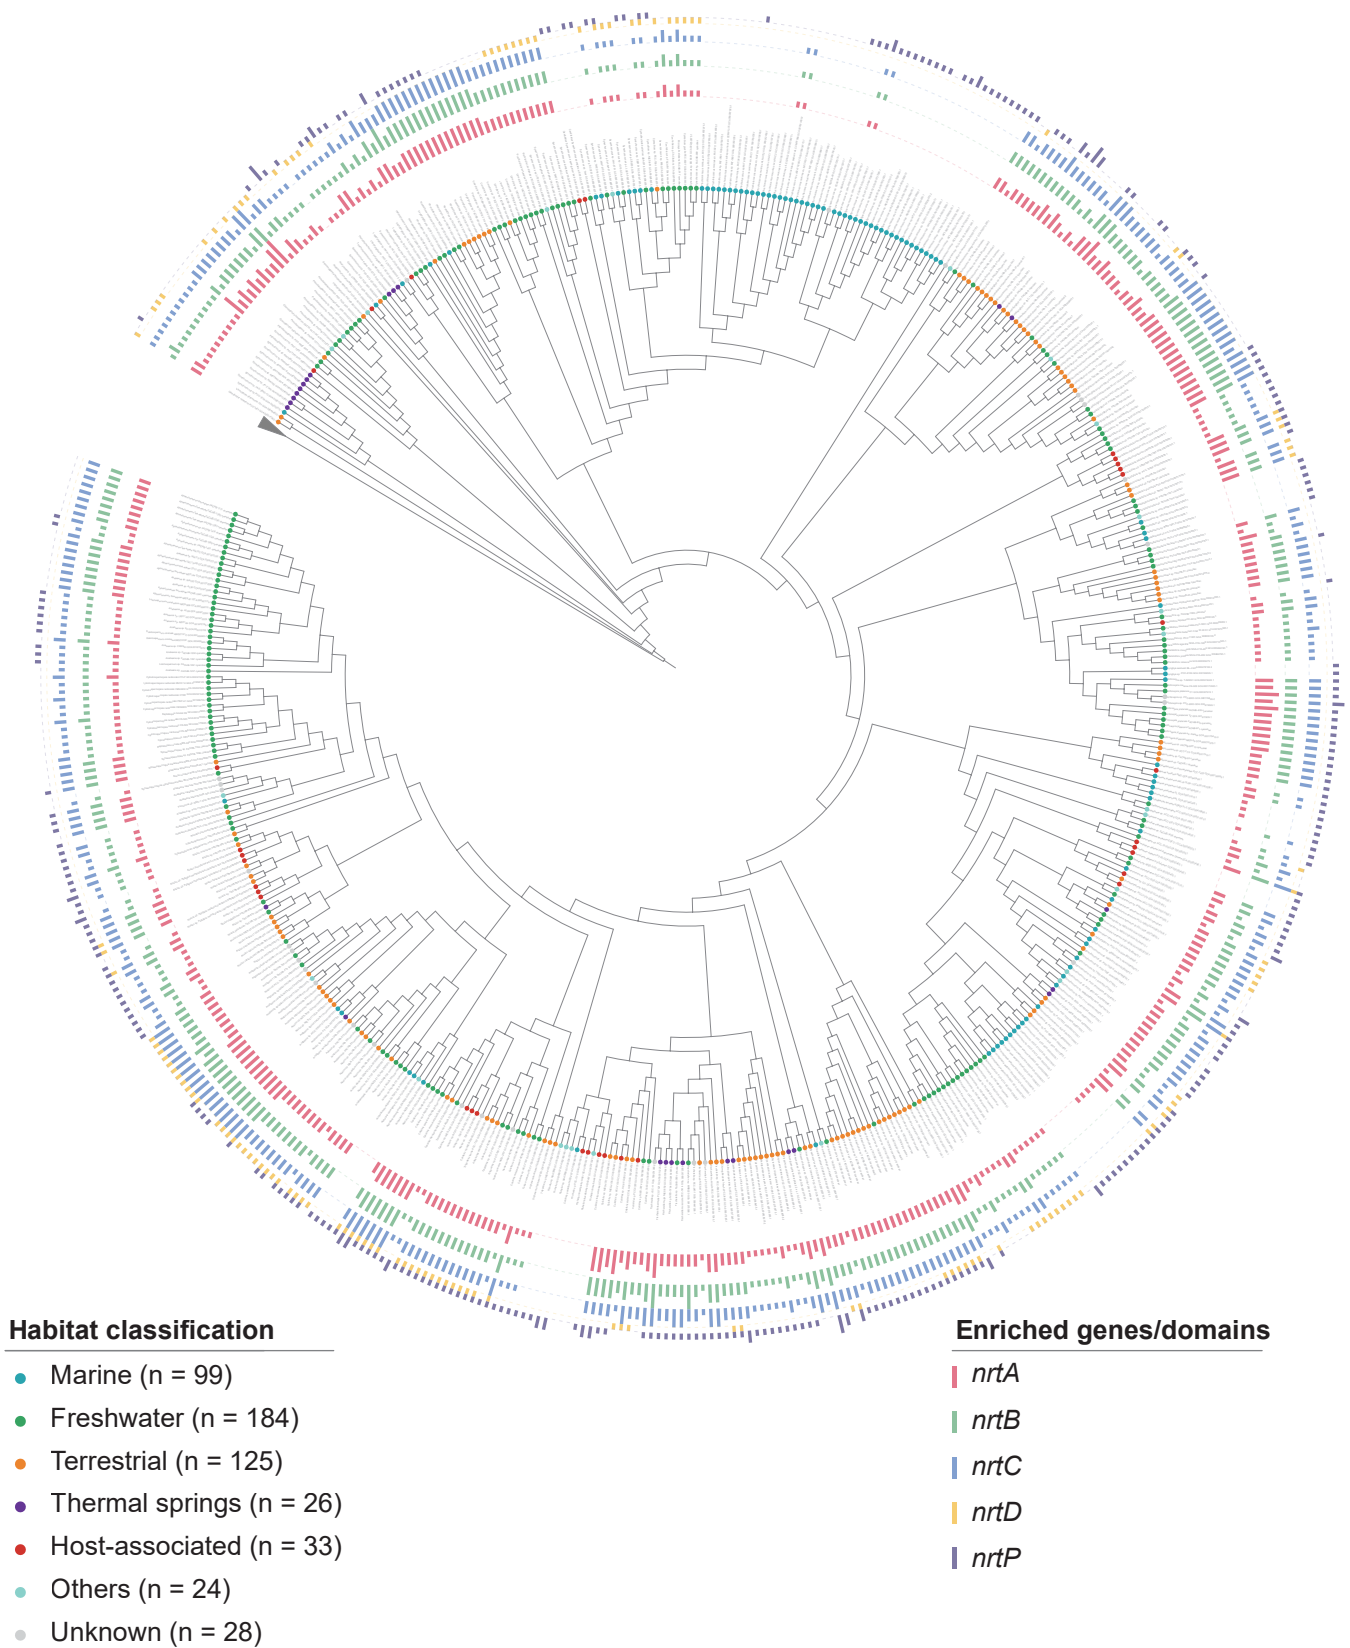

Fig S8. (Continued). Phylogenetic distribution of marine-enriched gene/domains. The phylogenetic tree is a subtree of genomic tree in Fig.1 that low-quality genomes were pruned. Grey triangle on the tree denotes outgroups. Colored circles represent ecosystems where strains derived from. Colored bars denote copy numbers of enriched genes or domains.
