# Supplementary material
Source: PubMed Central journal article supplement (PMC7852516)
Supplement: 41396_2020_775_MOESM11_ESM.pdf [file 41396_2020_775_MOESM11_ESM.pdf]

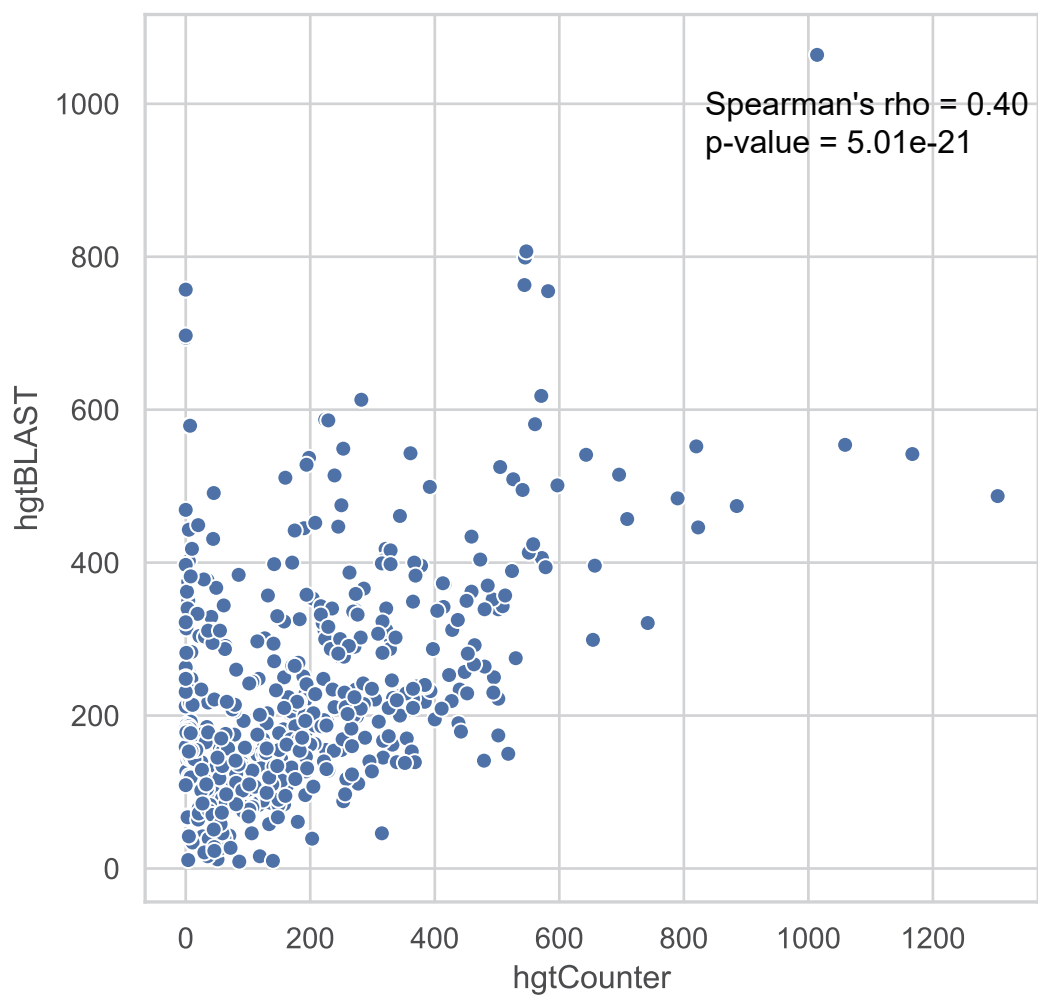

Fig. S11. The relations between the results of predicted horizontal gene transfer events between BLAST based approach and Counter software.
