# Supplementary material
Source: PubMed Central journal article supplement (PMC7852516)
Supplement: 41396_2020_775_MOESM13_ESM.pdf [file 41396_2020_775_MOESM13_ESM.pdf]

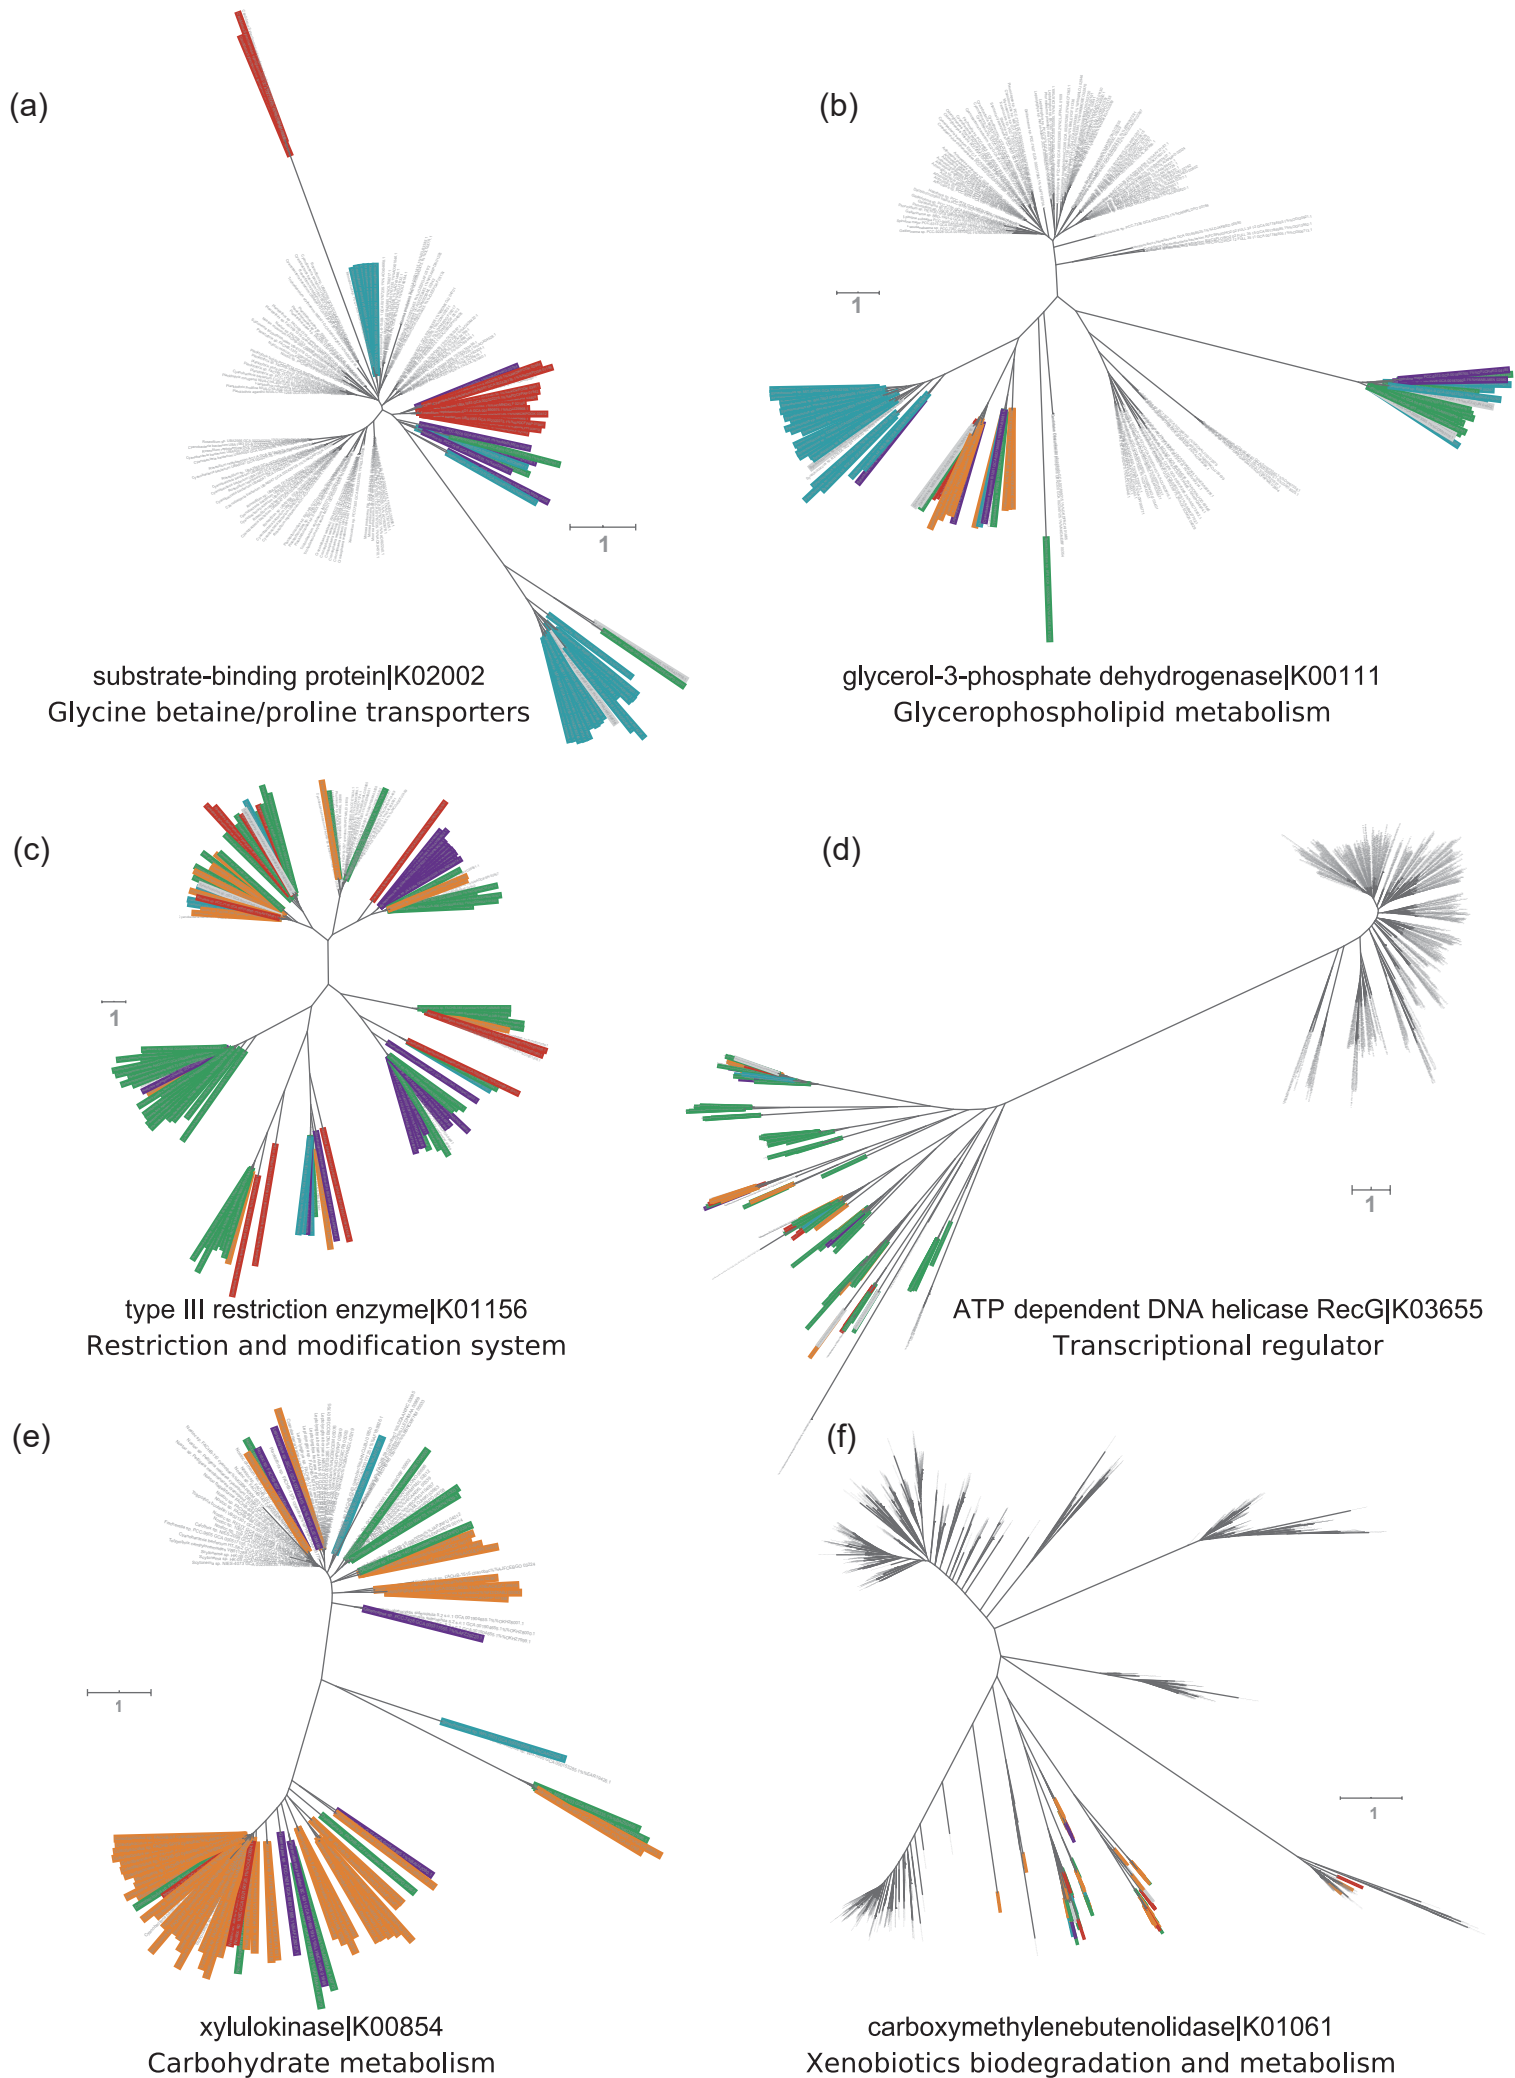

**Fig S13.** Gene trees of gene families that have undergone HGT with habitat-specific activity. Leaf names shown in color are genes found in the HGT inference. Different colors represent various environmental sources of sequences, the color code using the same scheme as in Figure 5b.
